# Supplementary material
Source: publisher figshare collection journal article supplement (https://acs.figshare.com/ndownloader/files/3756052)
Supplement: Supplementary file 1 [file 3756052]

## Supplementary Information for

# **Patterning Oxide Nanopillars at the Atomic Scale by Phase Transformation**

Chunlin Chen,<sup>†</sup> Zhongchang Wang,<sup>\*,†</sup> Frank Lichtenberg,<sup>‡</sup> Yuichi Ikuhara,<sup>\*,†,¶,§</sup> and  
Johannes Georg Bednorz<sup>||</sup>

<sup>†</sup>Advanced Institute for Materials Research, Tohoku University, 2-1-1 Katahira, Aoba-ku,  
Sendai 980-8577, Japan

<sup>‡</sup>Department of Materials, ETH Zürich, Zürich CH-8093, Switzerland

<sup>¶</sup>Institute of Engineering Innovation, The University of Tokyo, 2-11-16 Yayoi, Bunkyo-ku,  
Tokyo 113-8656, Japan

<sup>§</sup>Nanostructures Research Laboratory, Japan Fine Ceramics Center, 2-4-1 Mutsuno, Atsuta,  
Nagoya 456-8587, Japan

<sup>||</sup>IBM Research Division, Zürich Research Laboratory, Rüschlikon CH-8803, Switzerland

**Figure S1**

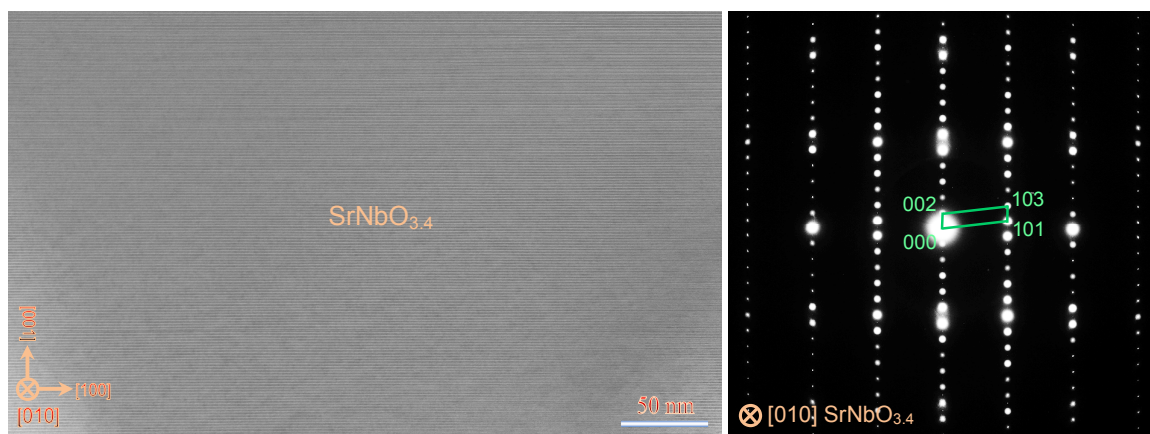

**Figure S1.** Bright-field TEM image and selected area electron diffraction pattern of  $\text{SrNbO}_{3.4}$ . The bright-field TEM image shows crystal structure and morphology of a  $\text{SrNbO}_{3.4}$  single crystal. The electron beam is along  $[010]$  direction. The homogeneous image contrast indicates that there is no secondary phase in this single crystal.

Figure S2

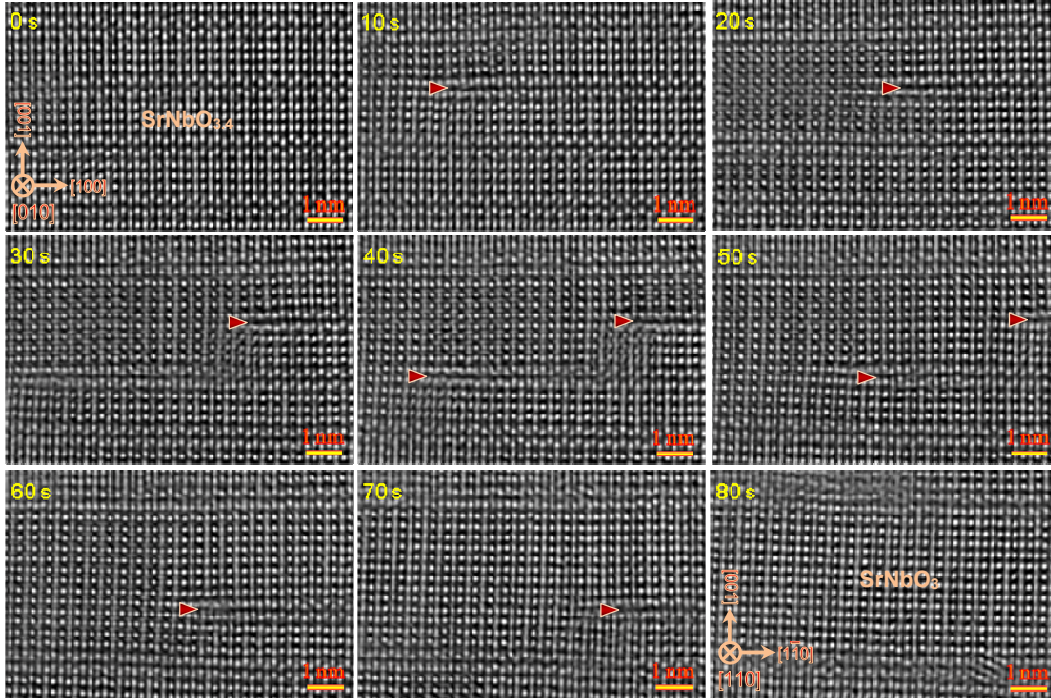

**Figure S2.** In-situ high-resolution TEM imaging of the phase transformation of  $\text{SrNbO}_{3.4}$ . A Series of HRTEM images as a function of the elapsed time during electron irradiation. The  $\text{SrNbO}_{3.4}$  phase transforms partially into the  $\text{SrNbO}_3$  phase induced by the electron irradiation. The layered structure of the  $\text{SrNbO}_{3.4}$  is visible along the  $[010]$  zone axis at the initial stage (0 s). After irradiation for 80 s, the  $\text{SrNbO}_{3.4}$  phase is completely transformed into the  $\text{SrNbO}_3$  phase. The arrows indicate the region where the phase transformation initiates. The whole phase transformation process can also be viewed in the Supplementary Movie, which is created by a successive recording of the HRTEM images.
